# Supplementary material for: Ceramic Hollow Fibre Constructs for Continuous Perfusion and Cell Harvest from 3D Hematopoietic Organoids
Source: Hindawi journal article supplement (doi:10.1155/2018/6230214), 2018-01-01

### **Supplementary Figure Legends:**

**Supplementary Figure 1: Cross-flow filtration MNC retainment.** (A) Calcein AM-positive pre-gated cells were then analysed for CD235a-PE and Hoescht expression. (B) Inoculated hUCB phenotype pre-filtration with isotype. (C) Cell types remaining in the shell-side after 24 hours for water (top) and DMSO (middle) fibres with DMSO fibre filtrate isotype (bottom). Legend: RBCs – Red Blood Cells; EBs – Erythroblasts; Enucs – E-nucleated Reticulocytes; MNCs – Mononuclear Cells.

**Supplementary Figure 2: Expression of hematopoietic, osteogenic, and endothelial markers within the scaffold region of day 21 HFBR cross-sections.** (A) A 3D confocal image highlighting the inset cropped for Figure 6C (500  $\mu\text{m}$  scale bar). (B) A large scale 3D confocal image (500  $\mu\text{m}$  scale bar) of demonstrating inset volumes represented in (C) with erythroid, hematopoietic, osteogenic, and endothelial phenotype markers expressed on nucleated cells within HFBR sections at day 21 (100  $\mu\text{m}$  scale bars), with the bottom image representing a negative isotype control of a static scaffold at day 21. Laser reflection was captured in grey on all images to demonstrate fibre and scaffold structure.

Supplementary Figure 1:

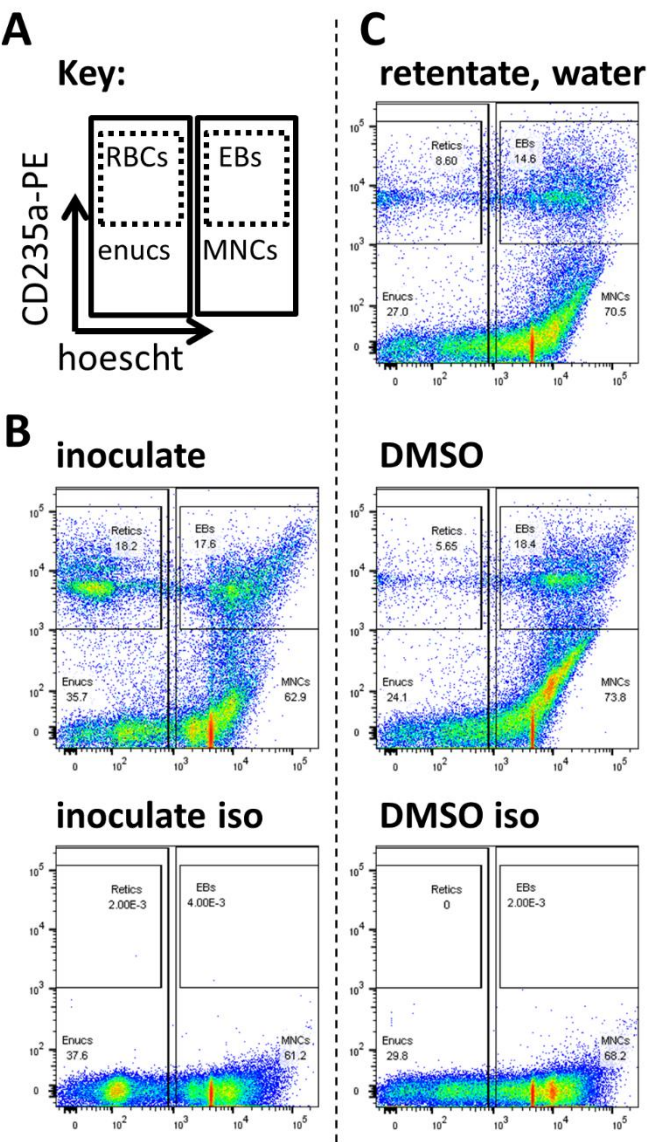

Supplementary Figure 2:

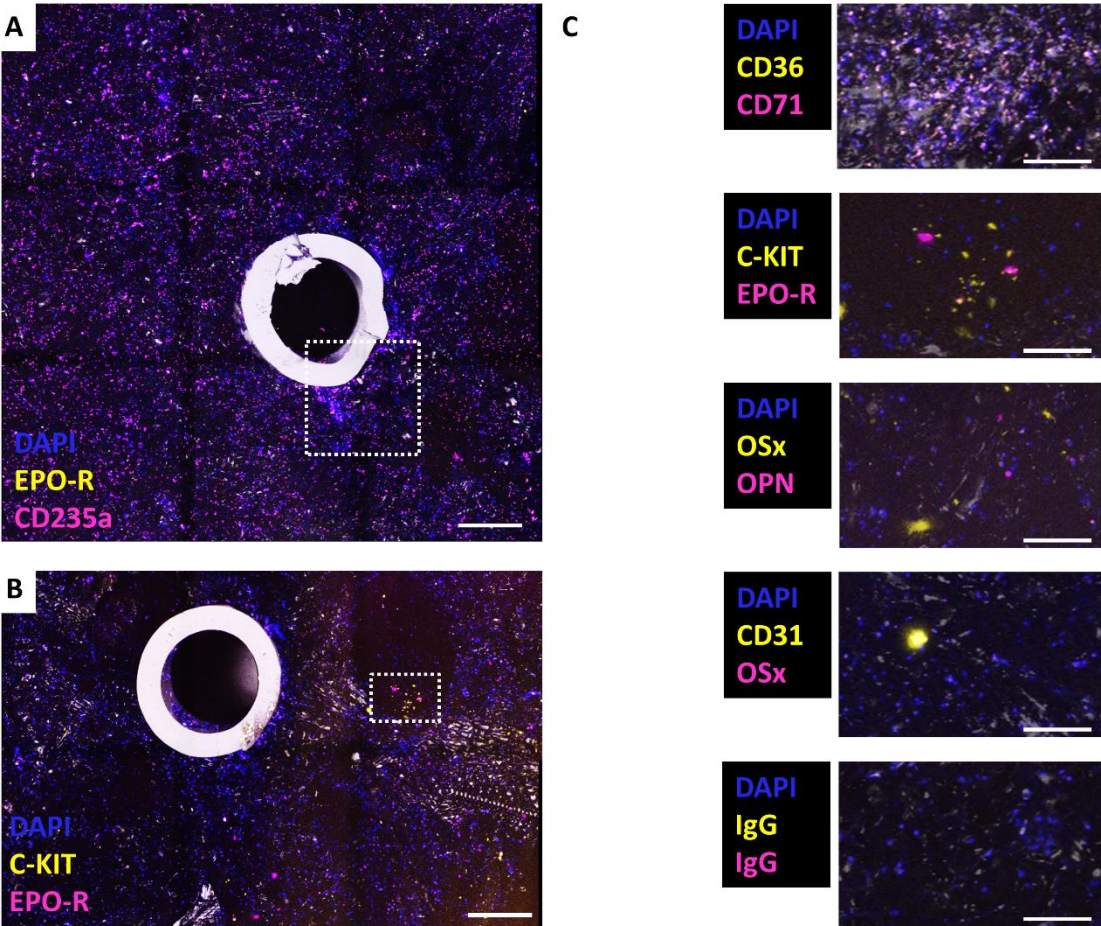

Supplement: f1 [file 6230214.f1.pdf]
